# Supplementary material for: TIGAR deficiency enhances skeletal muscle thermogenesis by increasing neuromuscular junction cholinergic signaling
Source: eLife. 2022 Mar 7;11:e73360. doi: 10.7554/eLife.73360 (PMC8947760; doi:10.7554/eLife.73360)
Supplement: Figure 3—figure supplement 1—source data 1. — The data was used in Figure 3—figure supplement 1. [file elife-73360-fig3-figsupp1-data1.xlsx]

## Sheet: Sheet1
			S1	S2	S3	S4	S5	S6	S7	S8	S9	S10	S11	S12	S13	S14	S15	S16	S17	S18	S19	S20	S21	S22	S23	S24
	Metabolite name	Mouse ID ➔➔➔	WT RT	WT RT	WT RT	WT RT	WT RT	WT RT	KO RT	KO RT	KO RT	KO RT	KO RT	KO RT	WT 4C	WT 4C	WT 4C	WT 4C	WT 4C	WT 4C	KO 4C	KO 4C	KO 4C	KO 4C	KO 4C	KO 4C
	Glutaric acid		9.31988	0.998891	1.96547	11.3939	33.1883	2.19496	27.7285	23.0038	32.716	35.3854	1.09249	20.7958	12.8828	11.958	0.855777	15.4966	19.757	0.986985	24.3006	19.4552	21.9872	56.3193	34.754	20.5192
	Citrulline		0.389427	0.31861	0.425729	0.398823	0.297436	0.296918	0.517055	0.464882	0.862558	0.772028	0.466615	0.354076	0.286521	0.351437	0.342332	0.268694	0.35465	0.286229	0.369093	0.410835	0.408329	0.588131	0.421033	0.394965
	3-Hydroxy-3-methylglutaric acid		0.0562193	0.0886564	0.0530584	0.0580656	0.0899658	0.0661522	0.0424183	0.069254	0.0675058	0.0576225	0.0724743	0.0454124	0.0783324	0.0526656	0.0679189	0.0779446	0.0480205	0.0712827	0.0896801	0.124277	0.0773002	0.0934782	0.094789	0.141458
	Phenylalanine		2.13467	2.18754	2.46872	2.45152	1.71364	1.91884	3.25089	3.24769	5.1968	2.8965	2.20279	2.24378	1.92156	2.21803	2.18612	1.95151	2.39414	2.61571	2.22201	3.04865	2.06141	3.67514	2.39952	2.59892
	Acetyaspartic acid		1.22288	0.976932	0.749985	0.890571	1.2317	1.00558	0.702178	1.06976	1.10263	1.0788	1.2778	0.811314	0.658554	0.464335	0.712198	0.622366	0.596454	0.886359	1.00339	1.97236	1.04451	1.19305	1.25569	2.16747
	Indoxyl sulfate		0.438314	0.589442	0.775256	0.973563	1.10913	1.40933	0.702502	0.668206	0.844341	1.85281	0.694788	1.10649	0.595717	0.433491	0.316763	0.506276	0.377528	0.747855	1.06829	2.30928	1.98935	1.02885	0.745651	0.382219
	Glyceric acid		0.105767	0.103963	0.118307	0.120414	0.0805021	0.0929105	0.154567	0.161939	0.256648	0.144097	0.10404	0.108209	0.0961409	0.10666	0.107978	0.0975126	0.118123	0.128582	0.109817	0.152326	0.100392	0.184593	0.123504	0.123297
	N-Acety-serine		3.25501	3.78814	3.73844	3.89035	4.21857	3.33583	3.52543	3.79739	2.80406	3.38874	2.92967	3.50392	2.96021	3.2471	3.33568	4.11587	4.11152	3.60948	3.19547	5.0422	4.34264	4.64864	4.19116	4.70709
	S-(5'-Adenosyl)-homocysteine		0.433507	0.390936	0.567957	0.59252	0.720632	1.01375	0.571345	0.773643	1.31072	1.03663	0.782673	1.39343	1.02015	1.24632	0.822464	0.601611	1.23274	0.738185	0.765736	1.71736	0.915191	2.07734	1.05273	1.50704
	N,N,N-Trimethyllysine		272.516	299.602	365.648	352.715	326.359	337.374	298.127	281.066	231.812	323.806	355.551	353.167	371.671	416.132	326.866	309.385	443.645	387.43	297.4	305.857	285.87	376.628	342.78	325.124
	Methylmalonic acid		0.295496	0.344089	0.381043	0.411381	0.452357	0.46967	0.404644	0.361125	0.39097	0.400274	0.341723	0.38972	0.33763	0.339717	0.447745	0.309951	0.332808	0.369207	0.284004	0.231528	0.278708	0.21493	0.329194	0.315201
	ATP		408.35	321.367	378.003	343.204	345.462	424.497	406.58	503.264	1479.42	618.27	462.34	398.092	271.121	341.302	331.977	422.649	517.036	571.032	293.363	200.672	416.828	118.909	119.519	43.8681
	2'-Deoxyadenosine 5'-monophosphate		0.134919	0.0755147	0.158282	0.261559	0.145726	0.16213	0.228103	0.206374	0.215799	0.211375	0.1583	0.196187	0.180315	0.188156	0.244886	0.220199	0.123806	0.159688	0.238514	0.260824	0.278114	0.205464	0.209215	0.204315
	Adenosine 5'-diphosphoribose		40.7877	38.2417	41.3138	78.6024	87.3909	187.368	133.978	136.473	147.076	159.906	54.0495	285.951	292.041	233.935	236.218	86.974	392.709	137.095	104.116	482.943	254.377	609.283	339.57	521.018
	Adenosine 5'-monophosphate		151.086	135.54	164.381	147.224	135.864	122.471	199.536	172.935	459.533	163.395	157.413	129.361	295.881	261.201	368.4	164.086	291.488	180.406	342.042	621.017	132.173	1432.72	492.442	510.888
	Inosine		0.0109595	0.00727274	0.0160307	0.0315425	0.0206638	0.0144264	0.00784907	0.0346476	0.0477286	0.0276929	0.0237582	0.0560724	0.0458768	0.044829	0.0455141	0.0265138	0.0386876	0.0430526	0.0551267	0.0999857	0.0233107	0.155222	0.0713229	0.21235
	Guanosine monophosphate		1.2053	1.21122	2.14465	1.8567	1.68679	0.918691	0.940402	1.41142	3.06909	0.948785	1.73027	2.11885	1.72854	2.18048	1.9774	1.52228	1.74824	2.08075	2.21345	6.6469	1.14417	10.008	4.52494	13.5768
	beta-Alanine		2.62043	3.94206	4.50677	2.56029	2.93069	3.25902	2.22007	2.35535	4.7706	3.08162	2.63992	2.49326	5.31485	3.85856	2.86498	3.59256	6.27284	3.16968	2.53577	3.07665	3.25061	4.11082	1.88371	1.88164
	Ribulose 5-phosphate		66.9044	44.2456	77.398	77.8705	82.1143	133.258	69.0657	105.845	161.889	118.682	70.8455	210.108	198.753	124.323	124.613	88.3698	247.129	135.9	105.646	340.35	154.381	349.567	191.168	336.889
	Pentose-phosphate		60.1893	42.0309	69.7669	70.9051	76.339	121.744	64.79	96.6632	147.231	110.135	66.2737	195.031	177.971	111.292	115.702	84.2081	222.055	127.076	98.9257	313.392	143.768	324.271	176.959	312.223
	Erythrose 4-phosphate		88.968	101.025	145.449	106.879	115.237	33.7517	20.6745	109.532	317.525	78.86	74.4583	96.5505	15.8098	126.466	100.225	150.613	80.5356	88.0134	106.705	36.3065	29.9134	71.3945	24.4511	28.0812
	5-Phospho-D-ribose 1-diphosphate		13.5834	13.9428	19.8099	14.8293	11.1372	6.77082	4.3823	11.4931	37.7248	10.93	11.8073	11.3567	5.01068	17.8275	15.2576	15.963	10.5717	11.1862	14.1416	6.23544	6.02967	5.49939	4.17259	4.13985
	Glucose 6-phosphate		663.002	670.059	786.013	648.289	370.447	113.279	46.0425	362.592	473.983	163.593	525.183	241.894	58.8718	467.805	347.19	167.229	242.347	208.793	301.055	144.219	99.8422	30.1248	89.579	77.9264
	Glycerol 3-phosphate		1122.87	1390.66	2282.56	1730.24	1193.01	1086.05	1042.66	1707.68	6023.98	2209.97	1104.74	895.491	1016.28	1361.02	1478.04	2269.2	1262.73	1595.87	1740.44	828.311	1293.81	514.964	449.265	361.736
	Galactaric acid		0.304393	0.317498	0.37788	0.272581	0.360057	0.263072	0.263205	0.310507	0.378049	0.272422	0.301436	0.261935	0.46595	0.52459	0.323846	0.396613	0.353954	0.235109	0.23977	0.231181	0.244652	0.327727	0.237948	0.251178
	Malic acid		76.5327	87.9004	90.157	88.0508	107.723	144.492	119.669	135.857	196.781	156.372	100.611	167.431	169.149	198.183	216.683	179.644	201.053	170.334	138.335	175.166	160.562	222.447	140.813	147.861
	Glutathione oxidized		4.9117	4.35647	5.62744	6.18078	5.4882	5.64552	5.32499	5.4218	5.34189	6.22252	5.01994	5.15174	6.60297	4.93664	4.83764	7.02207	6.44066	6.10117	6.30111	7.64563	8.51521	7.84139	6.70753	7.20717
	Ophthalmate		0.336711	0.374663	0.718806	0.280829	0.614161	0.593957	0.327928	0.302652	0.652969	0.494762	0.385326	0.407216	0.517039	0.686462	0.515628	0.734198	0.58191	0.743421	0.507344	0.697973	0.408259	0.595026	0.517673	0.291282
	Guanidinosuccinic acid		4.47145	2.63887	3.02036	2.85295	2.88343	2.9708	3.40884	4.60306	7.6003	3.57978	5.0072	2.38782	2.14313	2.32603	3.17626	1.89338	2.64937	3.55406	3.29574	6.17198	3.52343	5.31864	2.29156	3.45249
	Elaidic acid		0.0279814	0.0277878	0.0541075	0.0349437	0.0906544	0.0557212	0.0838234	0.0668367	0.0362972	0.0796834	0.0358431	0.0695406	0.0458955	0.0457013	0.0127264	0.0421947	0.0728752	0.0226059	0.107597	0.0704872	0.0652355	0.0770232	0.100976	0.0627448
	Ethylmalonic acid		0.0186068	0.0179888	0.308241	0.0125168	0.567153	0.294945	0.518221	0.322253	0.0302473	0.389764	0.171862	0.427819	0.0209012	0.186449	0.0119306	0.183899	0.523217	0.130564	0.506108	0.421593	0.250998	0.824463	0.519747	0.317704
	Palmitic acid		27.8373	27.074	34.8374	25.7569	41.5863	34.9345	46.8983	31.505	39.1379	42.5984	31.1058	37.8493	47.166	34.4896	28.1685	36.2666	49.9101	41.2516	44.1974	51.281	47.5839	55.6765	47.7156	46.2453
	cis-4,7,10,13,16,19-Docosahexaenoic acid		0.988386	0.850601	1.1248	0.931519	1.02645	1.15764	0.907338	1.57633	1.19254	1.00528	1.08276	1.28287	0.954593	0.942633	0.899096	1.16408	0.872364	1.05107	1.33991	1.67793	1.11407	1.37407	1.35377	1.21451
	Palmitoleic acid		0.00238631	0.00186911	0.00214255	0.00174931	0.000597198	0.00222804	0.00195312	0.00184973	0.00201467	0.000695842	0.00230437	0.00168594	0.00176016	0.00249808	0.00230055	0.00224829	0.00150313	0.00250871	0.00205894	0.00158877	0.00102606	0.000205481	0.000714594	0.00163737
	Nervonic acid		0.00796531	0.00394843	0.00659304	0.00528538	0.00337672	0.00649443	0.00417714	0.00553541	0.00383233	0.00306603	0.00656843	0.00438475	0.00474645	0.00701364	0.0071366	0.00468421	0.00256145	0.00573467	0.00303822	0.00337295	0.00392788	0.000867217	0.00310914	0.00367217
	Erucic acid		0.833777	0.642791	0.483477	0.570049	0.474794	0.682713	0.573112	0.507153	0.617873	0.482461	0.407561	0.53445	0.431625	0.535321	0.700852	0.789689	0.775745	0.599103	0.528252	0.398868	0.27608	0.506173	0.599769	0.411676
	Cholesteryl acetate		0.982087	0.963443	1.20375	1.18259	1.55778	1.39158	1.55102	1.13823	1.13853	1.29715	1.29388	1.40812	0.94347	0.931875	0.968895	1.16168	1.59691	1.05232	1.29543	1.31408	1.1621	1.4234	1.71332	1.30123
	(S)-Mevalonic acid		1.12755	0.77811	0.965188	1.201	1.18528	1.09696	1.01898	1.09251	1.16948	0.955381	1.0947	1.15913	0.8119	0.794712	1.00758	0.516966	0.700641	0.896699	0.87379	1.19511	1.09599	0.924576	1.03209	1.17336
	Nicotinamide adenine dinucleotide phosphate		0.20907	0.166534	0.185041	0.182131	0.202198	0.157031	0.240696	0.214611	0.064222	0.263156	0.186361	0.139149	0.138495	0.138864	0.229355	0.179874	0.198065	0.229085	0.162243	0.110507	0.181077	0.0611112	0.162709	0.116455
	β-Nicotinamide adenine dinucleotide		9.70478	9.69096	11.7363	8.90882	8.79256	8.48924	9.79704	10.5283	6.11053	10.1549	11.0582	8.49974	5.94785	8.39872	7.41619	8.44557	8.56141	9.29991	6.82124	6.47767	7.97375	8.2095	4.81629	6.84711
	Maleamic acid		0.0272213	0.0326436	0.0559302	0.0302871	0.0736197	0.0527091	0.0841274	0.0502211	0.0677348	0.0611816	0.0477638	0.0418196	0.0552933	0.0399602	0.0185741	0.0356457	0.0590952	0.0360127	0.0649336	0.0687722	0.0566115	0.115439	0.0893756	0.0628391
	Dehydroascorbic acid		59.8275	60.7147	63.9312	57.7255	57.1957	59.9134	58.4101	56.0505	56.7998	51.718	55.8659	58.6195	55.6622	52.1996	58.5153	57.9393	55.9829	59.4599	53.8793	51.0712	57.4087	56.2532	48.9653	53.908
	Phosphonoacetic acid		19.5866	23.1558	18.5068	19.5785	22.6986	17.5848	24.4657	21.9467	18.6945	20.0145	16.9841	20.6166	17.3178	14.4272	18.5935	23.1478	20.5085	21.0472	12.2546	16.0043	16.0906	17.083	10.4771	15.8996
	Flavone		0.00210874	0.00184783	0.00143306	0.0019697	0.00192109	0.00165933	0.00189638	0.00138218	0.00214655	0.00135142	0.00179946	0.00215803	0.00176725	0.00230245	0.00241323	0.00141779	0.0018002	0.00204248	0.0017	0.00210727	0.00107499	0.00089213	0.0018088	0.00113014
	beta aminobutyric acid		0.144401	0.232617	0.143879	0.101223	0.267226	0.160783	0.226136	0.210263	0.153284	0.101578	0.176178	0.129428	0.192045	0.0912449	0.160202	0.209079	0.212961	0.229193	0.177264	0.140232	0.227725	0.305566	0.342372	0.329946
	Uridine 5′-diphospho-N-acetylgalactosamine		26.8494	32.1776	38.074	40.1954	32.3122	30.1358	36.7485	40.9916	37.1948	43.0421	31.2951	29.4584	32.8594	36.4263	22.6437	30.4502	20.4732	23.1875	52.4393	74.879	42.639	49.7282	43.455	52.6053
	O-Acetyserine		4.44884	N/A	4.92333	2.96547	4.25817	2.37945	3.98092	3.78248	4.29016	3.77402	4.25903	3.43082	5.25371	3.65255	2.17339	3.63747	4.3767	4.13026	3.22598	5.44816	5.2443	5.71189	5.78287	5.18437
	5-Aminolevulinic acid		3.36677	3.20097	3.65875	4.6441	3.89447	3.5409	4.67867	4.11843	4.13043	4.04488	3.74853	4.22245	3.50292	3.54423	3.78279	4.00977	3.65303	3.71379	3.66329	5.31727	3.91592	4.17432	4.09672	4.8621
	O-Phosphorylethanolamine		3.90397	3.80326	4.03263	5.22905	5.19035	4.04181	3.88005	3.75571	3.9811	4.3076	3.5196	4.53364	4.5616	3.0208	3.10873	5.17051	3.94697	4.88718	3.95313	6.81392	7.24278	4.1866	5.51714	6.02876
	Cortexolone		0.00312382	0.00521631	0.00109734	0.00828385	0.00218178	0.00263385	0.0028677	0.00719828	0.00419153	0.00357306	0.00443796	0.00466464	0.0156889	0.00848608	0.00686628	0.00924033	0.00677342	0.00718174	0.0156763	0.0104546	0.00973025	0.0132111	0.0117131	0.0157908
	Pyridoxine		0.00979096	0.0146175	0.0121901	0.0101617	0.0153316	0.00987804	0.0108847	0.0152373	0.0232358	0.0116539	0.00798715	0.0133838	0.0112359	0.0112385	0.011375	0.00730691	0.00639139	0.00677361	0.013645	0.0128079	0.010732	0.0198024	0.0106975	0.0181859
	(+)-α-Tocopherol		0.0160232	0.0202469	0.012846	0.0182732	0.00835071	0.0140988	0.0163922	0.0207175	0.00812915	0.00717258	0.0133055	0.00620659	0.014807	0.0181816	0.0158311	0.0146755	0.01031	0.0229146	0.00640923	0.00560528	0.00769183	0.0029389	0.0079027	0.0107561
