# Supplementary material for: TIGAR deficiency enhances skeletal muscle thermogenesis by increasing neuromuscular junction cholinergic signaling
Source: eLife. 2022 Mar 7;11:e73360. doi: 10.7554/eLife.73360 (PMC8947760; doi:10.7554/eLife.73360)
Supplement: Figure 3—source data 1. — The data was used in Figure 3. [file elife-73360-fig3-data1.xlsx]

## Sheet: 18O data
		Mouse ID ➔➔➔	WT1-RT	WT2-RT	WT3-RT	TKO1-RT	TKO2-RT	TKO3-RT	WT1-4°C	WT2-4°C	WT3-4°C	TKO1-4°C	TKO2-4°C	TKO3-4°C
	18O Enrichment		4.20967	5.34415	5.17831	5.53813	5.17746	5.61667	5.07864	5.41359	5.61701	5.73298	5.18687	6.36507
1	AMP_M2_81		0.147998	0.180869	0.167364	0.235458	0.271036	0.171497	0.228281	0.294536	0.204049	0.350021	0.427428	0.401144
2	CP_M4_83		0.0914102	0.0971505	0.0933674	0.11174	0.090556	0.0967909	0.10187	0.106633	0.105155	0.11628	0.110618	0.113231
3	ATP_M4_163		0.246525	0.227785	0.213849	0.278948	0.225327	0.242317	0.266278	0.282804	0.265253	0.309076	0.296799	0.288188
4	ATP_M6_165		0.00953392	0.00946643	0.0087263	0.0141759	0.0101256	0.0111873	0.0132768	0.0135961	0.0125046	0.0173269	0.0144635	0.0159353
5	ATP_M4_83		0.0436698	0.040671	0.0396725	0.0501214	0.0395395	0.0441836	0.0495973	0.0518748	0.0476971	0.0571711	0.0534187	0.0532196
6	ATP_M4_243		0.356991	0.321283	0.307743	0.387247	0.314949	0.349252	0.398434	0.407001	0.380013	0.450127	0.44093	0.403306
7	ADP_M4_243		0.0713317	0.0526184	0.0513859	0.0714516	0.0665975	0.0785084	0.0932591	0.100861	0.0693436	0.100339	0.107285	0.0876009
8	ADP_M2_241		1.41952	1.18994	1.16724	1.30328	1.18858	1.24085	1.39473	1.50557	1.30367	1.55811	1.61971	1.31287
9	ADP_M2_81		0.147685	0.115394	0.107393	0.122814	0.129252	0.134989	0.159816	0.157333	0.13048	0.163709	0.17006	0.141123
10	CP_M2_81		2.32487	2.10409	2.10784	2.16624	2.04878	2.02672	2.20692	2.13944	2.07912	2.21593	2.26708	2.05034
11	ATP_M2_241		3.41638	3.00227	2.92725	3.19289	2.98127	2.96667	3.24707	3.27317	3.06477	3.37669	3.44057	2.97795
12	ATP_M2_161		2.97801	2.53708	2.52119	2.74191	2.55973	2.56493	2.85497	2.77951	2.64637	2.86749	2.90981	2.61661
13	ATP_M2_81		1.32938	1.1321	1.11351	1.24481	1.14704	1.16425	1.29871	1.31682	1.21051	1.33361	1.34157	1.20334
