# Supplementary material for: TIGAR deficiency enhances skeletal muscle thermogenesis by increasing neuromuscular junction cholinergic signaling
Source: eLife. 2022 Mar 7;11:e73360. doi: 10.7554/eLife.73360 (PMC8947760; doi:10.7554/eLife.73360)
Supplement: Figure 5—source data 1. — The data was used in Figure 5. [file elife-73360-fig5-data1.xlsx]

## Sheet: Sheet1
	Metabolite name		Mouse ID ➔➔➔	chTKO1	chTKo2	chTKO3	chTKO4	ChATcre1	ChATcre2	ChATcre3	ChATcre4	ChATcre1-4℃	ChATcre2-4℃	ChATcre3-4℃	ChATcre4-4℃	ChATcre5-4℃	ChATcre6-4℃	chTKO1-4℃	chTKO2-4℃	chTKO3-4℃	chTKO4-4℃	chTKO5-4℃	chTKO6-4℃
	L-Arginine			108.439	117.556	139.503	119.289	145.732	119.472	127.819	142.865	114.442	109.397	96.6987	151.133	100.45	113.819	114.519	163.885	110.489	142.515	129.077	179.366
	S-(5'-Adenosyl)-L-homocysteine			0.941621	1.02397	1.25065	0.95805	0.940745	0.927762	0.952204	0.817318	0.567014	0.535449	0.628696	0.693321	0.61034	0.663365	0.807765	0.841287	0.899911	0.750305	0.664356	0.740155
	3-Methylhistidine			1.74614	1.58249	1.26553	0.906613	1.76411	1.39292	1.20823	1.37684	1.35708	1.10297	1.42232	1.59133	1.61761	1.82672	2.44331	1.53912	2.07935	2.12242	2.5839	1.55359
	5-Hydroxylysine			0.0200524	0.024901	0.0256535	0.0357694	0.0384026	0.0301155	0.0270477	0.0299529	0.0324545	0.0112666	0.0164895	0.0278008	0.0168898	0.0300341	0.0493216	0.0585472	0.0333987	0.0345539	0.0315545	0.0398812
	L-Valine			38.7371	41.2285	37.1134	47.707	55.7202	53.6036	49.062	47.7253	49.6263	57.4755	47.8853	46.7099	43.8969	56.3868	69.7335	45.1851	79.3283	68.8765	71.7194	47.9556
	L-Methionine			6.85836	7.36974	8.65145	11.0291	8.27381	5.86513	7.72389	7.73052	4.97886	7.10964	5.18543	7.51466	6.1976	7.20606	8.01431	5.98354	7.74898	9.43011	7.52937	6.93117
	L-Proline			54.2425	48.8363	49.074	81.3742	59.8451	54.0454	56.0132	57.7823	52.008	69.6458	50.3818	52.8919	53.6799	57.7723	73.0561	58.5065	80.1255	64.0435	78.879	49.3447
	DL-Kynurenine			0.00334349	0.0025862	0.00343053	0.0036525	0.00524159	0.00405963	0.00311875	0.00398569	0.00544986	0.00515216	0.00513907	0.00530488	0.00476435	0.00413004	0.00580402	0.00729794	0.00532982	0.00614059	0.00444285	0.00518449
	L-Homoserine			5.29079	5.50328	4.67997	5.10169	5.90003	4.56076	7.74857	5.36085	4.00876	4.38571	4.24895	6.28947	5.43302	6.49305	6.97802	3.80667	7.38739	7.9112	7.18097	5.34905
	Adenosine-5'-diphosphoglucose			1.96138	1.16464	0.621803	0.710444	1.93657	1.88804	1.5143	0.983451	1.24957	1.7701	1.85865	1.69856	1.24791	1.48242	1.39973	1.54372	1.1402	1.09237	1.24872	1.32717
	3-Methoxy-tyrosine			0.00703293	0.0105603	0.0123252	0.01643	0.0202396	0.0139335	0.0171563	0.0144119	0.0144502	0.0119202	0.01807	0.0156424	0.0126465	0.0178437	0.0153492	0.017359	0.0247108	0.017451	0.0304638	0.0159634
	hypoxanthine			0.335463	0.839009	1.20871	1.32039	0.36759	0.614405	0.794904	0.69148	0.543614	0.556198	0.497817	0.353533	0.537007	0.449942	0.60879	0.44285	0.577185	0.966909	0.615585	0.778007
	guanine			1.46788	2.75786	5.94515	4.40886	1.72972	1.66854	2.36852	2.98926	2.50324	2.19762	2.04306	2.41058	2.39384	2.26828	1.98544	2.71261	2.93486	3.70701	4.06954	3.36536
	Guanosine monophosphate			3.155	6.47155	12.8639	9.56409	3.6739	4.13779	5.28454	6.04523	6.27997	3.68211	4.09932	4.86816	5.07341	4.43234	4.94569	5.86292	6.01384	7.89723	7.93242	8.89123
	cytosine			6.3959	6.76094	7.53436	7.49119	10.7148	9.77585	9.13053	9.32737	11.0453	12.6363	9.62904	12.3703	7.82274	9.07028	11.2047	11.3096	13.4747	13.648	13.4838	12.1659
	Uridine			0.0721029	0.11886	0.30936	0.266757	0.0870119	0.10911	0.117322	0.135089	0.104965	0.101272	0.0960901	0.0686334	0.089897	0.0819637	0.0944595	0.0956024	0.0940377	0.147096	0.103467	0.119404
	Uridine 5'-triphosphate			0.365865	0.444713	0.541344	0.705139	0.394313	0.473935	0.488455	0.535919	0.469202	0.349034	0.536157	0.467397	0.496672	0.495779	0.441766	0.428751	0.692179	0.682711	0.80508	0.589053
	Thymidine 5'-monophosphate			0.0947442	0.165968	0.385224	0.304856	0.13876	0.104253	0.173566	0.166159	0.138108	0.120396	0.146021	0.128629	0.159425	0.172032	0.147982	0.157903	0.129553	0.286818	0.260812	0.297205
	Uridine 5'-monophosphate			0.430691	0.775084	2.39425	2.0343	0.640206	0.483349	0.713529	0.902383	0.869209	0.698506	0.773311	1.02028	1.13556	0.96571	0.498083	1.09385	1.06151	1.63905	1.6553	2.28744
	Pentose-phosphate			0.229845	0.378539	0.432227	0.339726	0.244608	0.217443	0.206871	0.307132	0.297343	0.271514	0.279897	0.299536	0.2989	0.275078	0.284248	0.299507	0.378041	0.457492	0.324576	0.405146
	D-Ribulose 5-phosphate			89.2566	128.349	144.778	109.183	75.5963	96.9992	106.229	140.867	132.504	85.8532	143.2	103.077	102.139	107.631	134.679	151.585	182.882	148.553	119.639	141.808
	Pentose-phosphate			83.7376	117.307	140.255	101.535	68.9291	96.9847	105.265	128.856	119.478	85.0025	132.282	95.1539	92.8044	97.6283	125.268	140.84	154.25	154.318	109.614	136.932
	L-Lactic acid			282.442	267.779	363.741	324.116	267.462	309.143	287.405	268.315	274.268	214.393	256.476	252.543	250.076	252.374	269.66	253.666	272.565	305.111	261.226	253.959
	Glycerol 3-phosphate			1.0565	0.909999	0.260294	0.668051	1.69286	0.73701	0.929395	0.747509	1.26327	1.71215	1.48859	1.67984	1.13477	1.24851	1.6928	0.728303	1.34481	0.991454	1.03684	0.779317
	Flavin adenine dinucleotide			0.13568	0.116593	0.102059	0.119976	0.115517	0.0932031	0.124076	0.165472	0.113539	0.115769	0.106381	0.120987	0.107513	0.127219	0.148203	0.0952938	0.15152	0.13432	0.14617	0.137887
	L-Alpha-aminobutyric acid/ 2-Aminoisobutyric acid			0.180293	0.169426	0.186262	0.172067	0.22776	0.201036	0.217679	0.219924	0.190658	0.220573	0.20316	0.170534	0.158426	0.182637	0.24381	0.191857	0.265763	0.198329	0.202879	0.23169
	L-Methionine sulfoxide			0.101517	0.115386	0.128438	0.156693	0.134056	0.117393	0.136205	0.113546	0.0810847	0.0806517	0.0888109	0.106577	0.090444	0.100846	0.14919	0.148998	0.157169	0.151689	0.121169	0.150125
	Caprylic acid			0.242488	0.178432	0.124592	0.315131	0.212973	0.0970029	N/A	0.226929	0.113745	0.115835	N/A	0.213733	0.289476	N/A	0.261003	0.173804	N/A	0.304783	0.317257	0.303423
	2-Hydroxy-4-(methylthio)butyric acid			0.00256954	0.0040233	0.00390734	0.0037811	0.00517757	0.00320698	0.00417822	0.00459406	0.00610846	0.00602895	0.0041839	0.0047788	0.00349987	0.00352151	0.00876982	0.00717337	0.00629319	0.00526864	0.00691317	0.00548065
	Petroselinic acid			4.33186	4.54945	5.7244	5.07642	4.08907	4.12902	4.85576	3.83487	4.14429	4.60229	3.26415	3.50903	3.14391	4.00759	4.4694	3.33137	4.59892	4.44505	4.36654	4.83357
	Carnitine			219.377	205.464	198.836	234.208	231.059	196.173	222.193	205.27	167.781	185.41	163.425	164.591	172.318	189.445	196.588	175.317	194.263	206.886	201.45	186.619
	Butyryl-L-carnitine			0.508463	0.581892	0.489825	0.504514	0.689532	0.589443	0.571971	0.490504	0.872802	0.691011	0.900643	1.0952	0.624994	0.91047	0.900615	0.60249	0.686474	0.569101	0.565429	0.588344
	Lauric acid			0.00894871	0.00415062	0.0133356	0.012474	0.00965317	0.019699	0.00745567	0.0118225	0.0407295	0.0411577	0.0528257	0.0484951	0.0326864	0.0423039	0.0365403	0.0310314	0.0423472	0.0248297	0.0292785	0.0408195
	2-Hydroxypyridine			0.173158	0.195081	0.288949	0.247748	0.185869	0.195166	0.207634	0.265289	0.229302	0.194575	0.205793	0.193405	0.173755	0.213148	0.279437	0.214667	0.204749	0.228624	0.293714	0.254682
	L-Norvaline			4.63723	5.43367	4.87641	3.55323	7.12336	6.67128	4.26157	5.61922	5.64859	6.22225	5.58733	5.64856	4.85561	5.96864	6.6509	5.90867	7.16334	7.93233	6.78736	5.54797
	D-Saccharic acid			0.0055487	0.00483664	0.00335786	0.00701937	0.00384504	0.00403891	0.00505229	0.00582782	0.00482095	0.00709659	0.00413762	0.00531214	0.00445359	0.00579048	0.0111733	0.00698088	0.00765225	0.00808773	0.00814086	0.00417006
	(S)-(-)-1-Phenylethanol			0.145539	0.259158	0.147834	0.158772	0.287824	0.157052	0.172425	0.229446	0.169318	0.197246	0.0219488	0.14519	N/A	0.12795	0.350681	0.154841	0.436155	0.249655	0.225367	0.204937
	2,6-Diaminoheptandioate			0.151417	0.128872	0.103457	0.11511	0.149984	0.182291	0.132878	0.127236	0.0814941	0.130913	0.11359	0.0939701	0.200585	0.147702	0.31281	0.133489	0.354252	0.231177	0.353572	0.133685
	O-Acetyl-L-serine			8.25895	4.61587	2.30448	3.219	1.56452	0.775011	3.16024	6.04851	7.8657	11.5181	7.45369	7.60127	11.5048	3.5058	1.34604	5.94943	3.705	8.18662	6.75219	5.66425
	7,12-diketolithocholate			0.0140209	0.0154939	0.00752893	0.0094705	0.0157755	0.00504365	0.013806	0.0137304	0.0160888	0.0117492	0.0110985	0.0125949	0.0197228	0.0156133	0.0129492	0.00441469	0.00843851	0.0101345	0.0125544	0.00972115
	Asymmetric dimethylarginine			5.81071	6.33848	7.08524	6.95651	9.09278	7.89207	7.6876	8.4328	9.80873	7.32412	8.21708	9.4992	7.23632	7.8958	9.28249	11.8052	8.97364	8.41557	9.65794	10.0061
	5β-CHOLANIC ACID-3α, 6α, 7β-TRIOL			0.0328418	0.0338018	0.0419033	0.0875285	0.0328184	0.0586859	0.0518861	0.0363526	0.0520192	0.158856	0.0406724	0.0572309	0.0517416	0.0364069	0.0311374	0.0280358	0.0290705	0.0294391	0.0286444	0.0364043
	Trigonelline			1.23102	1.1303	0.995722	0.97857	0.939971	0.915669	0.949313	1.26385	0.889239	0.931878	1.05269	0.900819	0.899242	1.21577	1.37974	0.839426	1.59899	1.33219	1.69342	0.879936
	Pantothenic acid			28.8484	25.9452	24.6474	29.6206	24.2045	22.8012	27.5577	27.2174	22.424	16.696	25.5889	29.0453	26.4304	26.6836	30.5309	27.9325	27.1434	27.1752	29.0365	30.6018
