# Supplementary material for: TIGAR deficiency enhances skeletal muscle thermogenesis by increasing neuromuscular junction cholinergic signaling
Source: eLife. 2022 Mar 7;11:e73360. doi: 10.7554/eLife.73360 (PMC8947760; doi:10.7554/eLife.73360)
Supplement: Figure 6—figure supplement 1—source data 1. — The data was used in Figure 6—figure supplement 1. [file elife-73360-fig6-figsupp1-data1.xlsx]

## Sheet: Yan12032021
Sample Name	CTL001	CTL002	CTL003	CTL004	TKO001	TKO002	TKO003	TKO004		FC	p value		C005	C006	T005	T006	LC01	LC02	LC03	LC04	LC05	LC06	LT01	LT02	LT03	LT04	LT05	LT06
Sample ID
Order	24	7	15	1	19	14	2	9					22	17	16	5	23	18	8	12	10	4	21	20	11	13	3	6
COA	1.3978	1.26347	1.35445	1.26023	2.0427	1.69979	2.08316	2.15905		1.15526	0.000737897		1.7691	1.29281	2.05671	1.98219	1.31253	1.19035	1.35659	1.27265	1.22769	1.3766	2.27566	1.65698	2.02362	1.99313	1.6321	1.51988
OctCOA	N/A	9.71014e-05	9.43553e-05	0.00010765	0.000260035	0.000101774	0.000408854	0.000221036		1.32481	0.105107		0.000219894	0.000125483	0.000313509	0.000276197	0.000537445	0.000269483	0.00100685	2.0871e-05	0.000452046	0.00113698	0.000613994	0.000173975	5.46079e-05	2.81863e-05	0.000141988	N/A
P160_Butyryl-L-carnitine	0.0418387	0.0436993	0.0464806	0.0465041	0.131458	0.116444	0.120044	0.136761		1.31201	2.99523e-06		0.0395061	0.0442657	0.114417	0.102156	0.0451011	0.0450418	0.048264	0.0439796	0.0452576	0.0448552	0.0805267	0.0723958	0.0792173	0.0799109	0.0686992	0.0648169
P141_Hexanoyl-L-carnitine	0.000322537	0.000286368	0.000347453	0.000404169	0.00132866	0.00111793	0.00114758	0.00110482		1.33088	6.81674e-06		0.0004072	0.000524187	0.00100148	0.000811376	0.00038804	0.000336405	0.000380437	0.000346781	0.000310264	0.000356205	0.000793648	0.000664125	0.000773159	0.000689534	0.000490588	0.000514835
P107_Myristoyl-L-carnitine	0.655729	0.817007	0.973694	0.846409	2.25972	1.61304	1.52576	2.44367		1.31867	0.00311399		1.29799	1.06348	2.04525	1.98902	0.372186	0.33204	0.329154	0.400957	0.374648	0.379648	1.06744	0.860334	0.97507	1.00662	0.867066	0.87328
P119_Lauroyl-L-carnitine	0.000492165	0.000633301	0.000687977	0.000869355	0.00126646	0.00096117	0.000737479	0.00132114		1.16636	0.0436324		0.000674622	0.000672593	0.00102349	0.00110287	5.21396e-06	0.000136036	N/A	N/A	N/A	N/A	0.00018743	0.000702759	0.000754425	0.000730341	0.000684963	0.00104042
P131_Octanoyl-L-carnitine	0.000134531	0.000144037	0.000146821	0.000171684	0.000320315	0.000246702	0.000207988	0.000275737		1.20173	0.00393665		0.000144127	0.000275184	0.000331676	0.000185571	0.000197853	0.000150197	0.000267105	0.00022195	0.000206856	0.000186466	0.000320821	0.000232371	0.00029642	0.000209277	0.000200987	0.000208994
P120_Decanoyl-L-carnitine	0.000158051	0.000173387	0.000137564	0.000116111	0.000407292	0.000261924	0.000196731	0.000237909		1.14711	0.034072		4.92629e-05	0.000220519	0.000318137	0.00010575	0.000265226	0.000353658	0.00047094	0.00033879	0.000339897	0.000356133	0.000408902	0.000467908	0.000440735	0.000374919	0.000419813	0.000417129
Acetyl carnitine	0.0934029	0.0973766	0.104797	0.0976537	0.29884	0.244065	0.266137	0.305695		1.32006	1.7179e-05		0.0810296	0.101092	0.251601	0.236353	0.103304	0.102432	0.115256	0.0993334	0.102964	0.104783	0.218175	0.198715	0.21573	0.216984	0.182552	0.184489
AcetylCOA	0.148269	0.127486	0.132579	0.0863035	0.247067	0.178567	0.169334	0.232667		1.16317	0.0120228		0.134001	0.156523	0.212251	0.170359	0.0948937	0.0994908	0.10906	0.108444	0.116419	0.107329	0.0513745	0.101985	0.0608641	0.107752	0.0754841	0.0909207
Valeryl carnitine	0.0355709	0.0374091	0.0380531	0.0338525	0.0779352	0.0689614	0.0726131	0.0786152		1.19435	4.64733e-06		0.0312147	0.0346319	0.0636983	0.0585332	0.0831788	0.0826199	0.0876191	0.0786558	0.0819662	0.0832362	0.109929	0.103385	0.107243	0.105137	0.0945775	0.0924663
IsovalCOA	0.048326	0.0428461	0.0439378	0.0332612	0.0133506	0.0177176	0.0179348	0.0207479		0.927143	0.000423031		0.194123	0.0740752	0.0155514	0.0220444	0.0851105	0.155748	0.120782	0.0940463	0.0865921	0.0814581	0.0194612	0.0232536	0.0201401	0.0169104	0.0181045	0.0196225
SuccCOA	0.0382051	0.103026	0.0590911	0.15294	0.0689997	0.122337	0.24091	0.158701		1.12636	0.227079		0.0474727	0.0785276	0.10537	0.142037	0.0153327	0.0192842	0.0352001	0.0335132	0.0334085	0.0471169	0.0279004	0.0328669	0.0511021	0.0376976	0.0551344	0.0430698
Palmitoyl-DL-carnitine chloride	0.113072	0.156267	0.1524	0.192327	0.257605	0.171044	0.198062	0.249608		1.10492	0.293219		0.192671	0.204638	0.209061	0.185918	0.0603518	0.0546047	0.0664779	0.0664289	0.0698615	0.0613068	0.123819	0.123664	0.119548	0.154526	0.127042	0.15001
GluCOA	9.51756e-05	0.000565215	0.000174322	0.000555652	0.00014419	0.00195503	N/A	0.00277329		1.76497	0.186515		0.0015202	N/A	0.00261444	0.00129555	0.000168984	N/A	N/A	0.000430862	N/A	N/A	N/A	N/A	0.000384006	N/A	0.000238536	0.00043829
P105_Stearoyl-L-carnitine	0.130202	0.156963	0.14375	0.1199	0.19961	0.141095	0.169639	0.246435		1.09639	0.359009		0.170198	0.170011	0.198643	0.149676	0.0755808	0.072561	0.101286	0.112635	0.104566	0.0926111	0.329802	0.298963	0.285182	0.34148	0.270422	0.329749
18_0_CoA	0.0697642	0.0671913	0.0584678	0.0351844	0.103208	0.0732213	0.0513259	0.141262		1.2896	0.139084		0.0824762	0.106731	0.131707	0.123888	0.0304613	0.0286922	0.0310815	0.0341679	0.0399372	0.0571639	0.0281729	0.227263	0.0256115	0.0443456	0.0536023	0.14167
ButCOA	0.00593269	0.000313569	0.00497383	0.0048392	0.000903534	0.00143314	0.00348169	0.00449796		1.19742	0.778617		0.0303371	0.0108664	N/A	0.00512474	0.00983358	0.0187257	0.0137089	0.00845981	0.00973742	0.0091842	N/A	0.00178309	0.000895207	0.0029806	0.00123302	0.000788908
ArachCOA	0.0555359	0.0453206	0.0317514	0.024756	0.0503327	0.0329146	0.0305176	0.0636376		1.22837	0.46373		0.0783035	0.141938	0.0534952	0.0942655	0.0248754	0.0282737	0.0368039	0.0263683	0.0273683	0.0505492	0.00979923	0.15894	0.00849605	0.0118758	0.0186014	0.052248
16_1_CoA	0.113979	0.0892275	0.0701898	0.0442303	0.0654669	0.0593163	0.0493733	0.100299		1.20652	0.429132		0.15546	0.163552	0.0847491	0.201183	0.0453225	0.0374282	0.0473319	0.0421126	0.0468738	0.0733327	0.0211732	0.182111	0.0176256	0.0207845	0.037146	0.0685393
N-PRO	0.00154355	0.00152221	0.00198007	0.00342951	0.00546571	0.00266723	0.00416965	0.00435781		1.19854	0.382717		0.00749224	0.00497776	0.00379169	0.00313558	0.00494712	0.00523188	0.00392425	0.00424883	0.00183076	0.00469753	0.00219197	0.0044029	0.00440703	0.00279907	0.00256718	0.00180053
16_0_CoA	0.0897397	0.0740737	0.069326	0.0402783	0.0944904	0.0534091	0.0458095	0.0979196		1.20129	0.380922		0.102386	0.173307	0.104943	0.13571	0.0307173	0.0320447	0.0340923	0.0305179	0.0311568	0.0575318	0.0190341	0.172613	0.0187527	0.0232642	0.0395105	0.100316
DL-3-Hydroxyl-3MthhygluCOA	0.00266788	0.00202187	0.00137779	0.00139132	0.00316848	0.00318535	0.00199886	0.00253813		1.01712	0.915305		0.00299897	0.00309711	0.00250451	0.000400048	0.00141435	0.000682633	0.000624999	0.000104232	0.000241801	0.00137134	0.000184509	0.00270275	9.48521e-05	0.000165411	0.00136968	0.00193488
OleCOA	0.41291	0.29816	0.275164	0.174924	0.321402	0.221034	0.180841	0.503508		1.25151	0.351355		0.405644	0.782444	0.459844	0.705625	0.158702	0.162999	0.160509	0.166449	0.133677	0.262881	0.110143	1.01972	0.0979305	0.117545	0.191932	0.548782
MalCOA_IS	N/A	N/A	N/A	N/A	N/A	N/A	N/A	N/A					N/A	N/A	N/A	N/A	N/A	N/A	N/A	N/A	N/A	N/A	N/A	N/A	N/A	N/A	N/A	N/A
											1.0481
MalCOA	0.000750151	0.00109521	0.000115015	0.00131596	0.00101276	0.000632814	0.00175594	0.00166973			0.855253		0.000286304	0.000879874	0.000797426	0.00094224	0.000377632	0.000123485	0.000817609	4.9118e-05	0.00035883	0.000362138	4.11096e-05	0.00107722	8.81493e-05	0.0012402	0.000257313	0.00156195
MalCOA_M1	0.000174701	0.000340417	0.000311388	0.000269911	N/A	0.000353599	0.000104664	0.000112475					4.86005e-05	N/A	0.000111064	0.000386219	0.000216214	0.000283979	0.000426759	0.000275263	9.85189e-05	0.000429443	0.000227639	0.000352737	0.000250272	0.000225	0.000211382	0.00049144
MalCOA_M2	0.0140315	0.013316	0.0132382	0.0132646	0.0157968	0.014635	0.0140983	0.0166167					0.0126181	0.0139084	0.0157144	0.0148196	0.0142165	0.0132227	0.0143087	0.0154539	0.012744	0.015364	0.0161152	0.0156743	0.0142364	0.0144372	0.0157408	0.0142909
MalCOA_M3	1.03452	1.02747	0.944643	0.936796	0.907467	0.962249	0.941241	1.03345					0.909381	1.05025	1.03745	0.986815	1.02633	1.01222	0.988788	0.936419	0.986608	1.0595	0.991541	0.951305	1.0153	1.02066	1.0175	0.983818
GluCOA_M1	0.000156084	0.000144447	0.000163674	N/A	N/A	0.000363954	7.28989e-05	0.000219443					0.000581103	0.000533369	0.000166428	0.000119219	0.00029055	N/A	0.000342417	0.000245268	0.000312845	0.000185754	0.00032488	0.000740582	0.00117	0.000342371	N/A	N/A
GluCOA_M2	0.000240681	0.000208058	0.000253773	5.2607e-05	0.0019035	N/A	0.000408982	N/A					N/A	0.000548901	N/A	7.37917e-05	N/A	N/A	N/A	0.00036351	0.000462913	N/A	0.00173405	N/A	0.00026057	0.000457106	N/A	N/A
GluCOA_M3	N/A	N/A	N/A	0.000220443	N/A	N/A	0.000219625	0.000473368					N/A	0.000118589	0.000684536	N/A	N/A	0.000473611	0.000516941	0.000146466	0.000637985	0.000259632	0.000646718	0.000393665	0.000358993	0.000280689	0.000137725	N/A
GluCOA_M4	0.00037582	N/A	0.00066671	N/A	N/A	N/A	0.000211047	0.000125592					N/A	N/A	N/A	0.000563601	0.000361381	N/A	0.000885091	0.00102803	N/A	0.000407524	N/A	0.000219458	0.000505128	0.000182227	0.000225671	0.000273045
GluCOA_M5	0.00689392	0.00750594	0.00329927	0.0056642	0.0175366	0.0114312	0.00684287	0.00661203					0.00875449	0.0215644	0.00766192	0.0057639	0.00679835	0.005237	N/A	0.00592806	0.00750854	0.00320049	0.00280427	0.00312958	0.00484777	0.00216919	0.00358419	0.00605199
											1.12636
SuccCOA	0.0382051	0.103026	0.0590911	0.15294	0.0689997	0.122337	0.24091	0.158701			0.653619		0.0474727	0.0785276	0.10537	0.142037	0.0153327	0.0192842	0.0352001	0.0335132	0.0334085	0.0471169	0.0279004	0.0328669	0.0511021	0.0376976	0.0551344	0.0430698
SuccCOA_M1	0.00536973	0.0203933	0.0125604	0.0274658	0.0131465	0.0217736	0.0457456	0.0304583					0.00858654	0.0115782	0.0205235	0.0234565	0.00632275	0.00531486	0.0171051	0.0142298	0.012403	0.0207159	0.00984327	0.0112887	0.0214106	0.0140924	0.0183666	0.0184423
SuccCOA_M2	0.00260493	0.00725942	0.0048868	0.0116776	0.00600041	0.00890067	0.0183954	0.0128869					0.00420148	0.00489421	0.00773936	0.00987554	0.00772324	0.0106069	0.0206758	0.0192168	0.0188581	0.0300272	0.0212186	0.0209046	0.0359359	0.0234485	0.0371275	0.0341232
SuccCOA_M3	0.00029494	0.000337175	0.000422648	0.00179041	0.000134569	7.88361e-05	0.00471354	0.00228638					0.000436456	0.000567134	0.00131076	0.000583938	0.00525484	0.00437158	0.0113777	0.00854341	0.00877123	0.0172619	0.00861803	0.00846313	0.0194625	0.0111117	0.0154551	0.0147627
SuccCOA_M4	N/A	9.14819e-05	4.34771e-05	0.000136042	0.000434941	0.000986321	N/A	0.000260321					0.000243802	0.000791142	0.000365167	0.00034155	0.00111815	0.00278022	0.00744356	0.00667263	0.00531561	0.00775986	0.00892721	0.00884984	0.0164538	0.0105054	0.0166246	0.0133002
											1.16317
AcetylCOA	0.148269	0.127486	0.132579	0.0863035	0.247067	0.178567	0.169334	0.232667			0.233126		0.134001	0.156523	0.212251	0.170359	0.0948937	0.0994908	0.10906	0.108444	0.116419	0.107329	0.0513745	0.101985	0.0608641	0.107752	0.0754841	0.0909207
AcetylCOA_M1	0.0193286	0.0202031	0.0188171	0.0100312	0.0313241	0.0230376	0.0189606	0.031099					0.0171743	0.0222766	0.0263244	0.0222013	0.0132446	0.0144098	0.0060354	0.0160784	0.0152213	0.0137782	0.0086428	0.0139125	0.00984153	0.016129	0.010715	0.013721
AcetylCOA_M2	0.142475	0.131914	0.13499	0.0890048	0.183149	0.163725	0.133527	0.140061					0.171517	0.141301	0.166134	0.131548	0.213962	0.229148	0.275191	0.247136	0.242132	0.212543	0.195772	0.147393	0.228208	0.282575	0.1804	0.137049
P113_C18_d3.IS	N/A	N/A	N/A	N/A	N/A	N/A	N/A	N/A					N/A	N/A	N/A	N/A	N/A	N/A	N/A	N/A	N/A	N/A	N/A	N/A	N/A	N/A	N/A	N/A
P108_C16_d3.IS	N/A	N/A	N/A	N/A	N/A	N/A	N/A	N/A					N/A	N/A	N/A	N/A	N/A	N/A	N/A	N/A	N/A	N/A	N/A	N/A	N/A	N/A	N/A	N/A
P126_C10_d3.IS	N/A	N/A	N/A	N/A	N/A	N/A	N/A	N/A		#DIV/0!			N/A	N/A	N/A	N/A	N/A	N/A	N/A	N/A	N/A	N/A	N/A	N/A	N/A	N/A	N/A	N/A
P134_C8_d3.IS	N/A	N/A	N/A	N/A	N/A	N/A	N/A	N/A		#DIV/0!			N/A	N/A	N/A	N/A	N/A	N/A	N/A	N/A	N/A	N/A	N/A	N/A	N/A	N/A	N/A	N/A
P148_C6_d3.IS	N/A	N/A	N/A	N/A	N/A	N/A	N/A	N/A		#DIV/0!			N/A	N/A	N/A	N/A	N/A	N/A	N/A	N/A	N/A	N/A	N/A	N/A	N/A	N/A	N/A	N/A
P155_C5_d9.IS	N/A	N/A	N/A	N/A	N/A	N/A	N/A	N/A		#DIV/0!			N/A	N/A	N/A	N/A	N/A	N/A	N/A	N/A	N/A	N/A	N/A	N/A	N/A	N/A	N/A	N/A
P163_C4_d3.IS	N/A	N/A	N/A	N/A	N/A	N/A	N/A	N/A					N/A	N/A	N/A	N/A	N/A	N/A	N/A	N/A	N/A	N/A	N/A	N/A	N/A	N/A	N/A	N/A
											1.32006
P189_Acetyl carnitine chloride	0.0934029	0.0973766	0.104797	0.0976537	0.29884	0.244065	0.266137	0.305695			0.230546		0.0810296	0.101092	0.251601	0.236353	0.103304	0.102432	0.115256	0.0993334	0.102964	0.104783	0.218175	0.198715	0.21573	0.216984	0.182552	0.184489
P195_C2_m1	0.00729441	0.00735077	0.00719286	0.00736705	0.0210118	0.0165656	0.017519	0.0215001					0.00707815	0.0084654	0.0181508	0.0159636	0.00922393	0.00865814	0.011785	0.0102134	0.00924247	0.009391	0.018169	0.0181403	0.0182197	0.0186393	0.0159879	0.0158027
P195_C2_M2	0.0176516	0.0173582	0.0171277	0.0170289	0.0185505	0.0180503	0.0194409	0.0185208					0.0179399	0.017803	0.0192169	0.0182547	0.0712235	0.0728129	0.0788974	0.0721028	0.0742393	0.0721047	0.162862	0.145513	0.158211	0.157193	0.134079	0.143047
P195_C2_d3.IS	N/A	N/A	N/A	N/A	N/A	N/A	N/A	N/A					N/A	N/A	N/A	N/A	N/A	N/A	N/A	N/A	N/A	N/A	N/A	N/A	N/A	N/A	N/A	N/A
P233_carnitine	0.00262242	0.00250417	0.00467932	0.0043012	0.00562878	0.00434953	0.00506799	0.00460493			0.93086		0.00391108	0.00324848	0.00270841	0.00355001	0.00628374	0.00776595	0.00654677	0.00707761	0.0074635	0.00788181	0.00551114	0.00538085	0.00748295	0.00702169	0.00583459	0.00566545
P232_C0_d3.IS	N/A	N/A	N/A	N/A	N/A	N/A	N/A	N/A					N/A	N/A	N/A	N/A	N/A	N/A	N/A	N/A	N/A	N/A	N/A	N/A	N/A	N/A	N/A	N/A

## Sheet: 13C Enrichment
Acetyl-Carnitine		LC01	LC02	LC03	LC04	LT01	LT02	LT03	LT04		Average C	Average T		FC T vs C	p value		LC05	LC06	LT05	LT06
	M1	1.43207	1.12967	2.2135	2.19228	1.03272	1.51282	1.11037	1.20199		1.74188	1.21448		0.697221	0.121791		1.43307	1.4534	1.2935	1.15234
	M2	37.5298	38.457	37.0153	38.5441	39.7862	39.0696	39.2853	38.9232		37.8866	39.2661		1.03641	0.0159912		38.6987	37.4711	39.2444	40.7368
	Sum	76.4917	78.0436	76.2441	79.2804	80.6051	79.6521	79.6809	79.0484		77.515	79.7466		1.02879	0.0287262
SuccCOA
SuccCOA_M1		12.5912	5.43381	14.6497	12.4633	7.78854	8.0798	10.4601	9.34283		11.2845	8.91783		0.790271	0.303907		10.1625	12.4844	7.30657	10.72
SuccCOA_M2		20.3059	25.4898	21.307	22.5419	29.0343	25.7476	25.1131	24.1429		22.4111	26.0095		1.16056	0.058746		23.5689	24.2155	26.748	28.5658
SuccCOA_M3		13.3535	7.38414	9.92998	7.38551	7.63565	6.96691	10.8594	8.63348		9.51329	8.52386		0.895995	0.570624		8.36143	11.7451	7.52666	8.34286
SuccCOA_M4		-0.641069	4.33343	6.09172	6.47334	10.24	9.51225	9.63634	9.46067		4.06435	9.71232		2.38963	0.0139508		4.52737	3.3148	10.4282	9.0267
	Sum Mn	37.944	64.9145	99.7509	43.6385	109.74	104.583	105.618	108.987		61.562	107.232		1.74185	0.0174375
Succinate_247
	m1	0.998061	7.20622	9.57811	4.609	6.16534	7.78609	7.07275	5.10897		5.59785	6.53329		1.16711	0.644691		9.99859	6.19243	7.44045	6.67732
	m2	7.44404	15.0558	15.2225	12.1117	22.0028	20.8632	22.6789	23.9062		12.4585	22.3628		1.79498	0.00213077		14.3297	10.2066	22.6046	19.8382
	m3	4.00806	0.739515	2.97779	1.63428	7.65323	8.44189	8.31102	8.34413		2.33991	8.18757		3.49909	0.000224074		7.72472	5.64793	7.93829	6.80313
	m4	2.50841	6.34453	12.6986	2.47582	9.15233	7.43621	7.06369	7.75822		6.00684	7.85261		1.30728	0.47992		8.48825	10.0103	8.04868	7.89844
	Sum Mn	37.944	64.9145	99.7509	43.6385	109.74	104.583	105.618	108.987		61.562	107.232		1.74185	0.0174375		95.7851	83.5906	108.659	98.3568
Fumarate_245
	m1	9.1119	9.51118	9.32081	9.91561	7.6082	7.09218	6.80864	7.7633		9.46487	7.31808		0.773183	0.000259491		10.1932	10.1707	7.27326	7.41098
	m2	20.1349	19.9114	19.8752	18.8595	20.861	20.9842	20.8081	20.7649		19.6952	20.8546		1.05886	0.00695697		20.3516	19.7321	20.7172	21.528
	m3	9.62458	9.77183	10.0498	9.65337	14.4287	14.4199	14.6929	14.9789		9.7749	14.6301		1.4967	9.89418e-08		9.8981	9.34481	14.8162	14.2925
	m4	4.45244	4.90727	4.54855	4.58094	6.76358	6.23348	6.34624	6.47308		4.6223	6.4541		1.3963	1.90788e-05		4.19295	4.75443	6.41911	7.13841
	Sum Mn	96.0652	98.2785	97.4148	94.9185	119.671	117.254	117.888	120.122		96.6692	118.734		1.22825	6.0721e-07		97.3624	96.687	118.833	121.898
G3P_357
2-carbons	M0	86.4698	86.4022	85.9335	85.929	82.8522	82.8999	82.804	82.6494		86.1836	82.8014		0.960755	6.31124e-07		85.3633	85.5281	82.8869	82.1711
	M1	0.020011	-0.0218947	0.209905	-0.113774	0.0812311	0.0770762	0.0399261	-0.0885053		0.0235618	0.027432		1.16426	0.962449		0.150092	-0.246529	-0.101706	0.0338293
	M2	13.7488	13.8389	14.1379	14.4222	17.336	17.3336	17.498	17.8052		14.0369	17.4932		1.24622	1.71961e-06		14.6537	14.8493	17.555	18.0503
	Sum	27.5175	27.656	28.4857	28.7306	34.7532	34.7443	35.0358	35.5219		28.0974	35.0138		1.24616	1.11553e-06		29.4574	29.4521	35.0083	36.1343
Pyruvate_174
	M1	0.487962	-0.239954	1.78215	-2.69573	1.61682	-0.539635	3.42025	0.888233		-0.166392	1.34642		-8.09182	0.271913		2.63366	2.41355	1.95534	2.16938
	M2	1.65297	3.98496	2.81697	0.647315	3.41907	3.21653	3.81571	2.416		2.27555	3.21682		1.41364	0.272765		6.57599	2.77854	2.74477	3.35143
	M3	48.5404	52.7721	56.7893	31.5005	53.6134	57.5075	57.8628	59.4835		47.4005	57.1168		1.20498	0.139076		44.9657	44.3039	55.6422	52.442
	Sum	149.415	166.046	177.784	93.1003	169.295	178.416	184.64	184.171		146.586	179.13		1.22201	0.139143		150.683	140.882	174.372	166.198
Lactate_219
	M1	1.36392	2.36884	1.64195	1.83552	2.85915	2.53189	2.79052	2.5209		1.80256	2.67562		1.48434	0.00890494		1.09243	2.8206	2.82841	2.59756
	M2	2.57686	2.26976	3.08556	4.28061	4.58311	4.81117	4.56138	4.04307		3.0532	4.49968		1.47376	0.0219512		2.3023	2.52608	5.16046	3.13467
	M3	54.2973	57.7507	58.3995	54.8221	54.3385	55.8431	52.1811	55.3314		56.3174	54.4235		0.966371	0.198283		59.9129	58.3878	54.2828	53.3542
	Sum	169.41	180.161	183.012	174.863	175.041	179.683	168.456	176.601		176.861	174.946		0.989169	0.63431		185.436	183.036	175.998	168.93
alph-Glycerol phosphate_445
	M1	0.362446	-0.194402	1.25331	0.130252	0.835849	0.693683	0.259325	1.10594		0.3879	0.723699		1.86568	0.383339		0.551881	0.607255	0.00348726	0.102999
	M2	0.380202	0.246298	0.104639	0.327936	0.134488	0.703133	0.282969	0.237123		0.264769	0.339428		1.28198	0.610042		0.406727	-0.0431126	0.331214	0.542943
	M3	13.5287	14.3061	14.7272	14.5548	17.5134	17.7151	17.6353	17.9066		14.2792	17.6926		1.23905	1.75e-05		14.9977	15.0369	18.0972	18.4213
	Sum	41.7089	43.2165	45.6441	44.4506	53.645	55.2453	53.7313	55.2998		43.755	54.4804		1.24512	3.05692e-05		46.3583	45.6318	54.9576	56.4528
Aspartic acid_232	3-carbon, carbon 2-4
	M1	15.1748	15.2326	14.7682	15.0496	15.2821	15.3633	15.2685	15.1709		15.0563	15.2712		1.01427	0.100059		15.2687	15.1452	15.1598	15.151
	M2	16.1741	16.4295	16.0871	16.4185	20.2239	20.1642	20.2657	20.3086		16.2773	20.2406		1.24349	1.03912e-08		16.7661	16.6101	20.0846	20.3637
	M3	7.23379	7.20792	7.07048	7.43659	11.5522	11.5045	11.7148	11.8146		7.2372	11.6465		1.60926	1.16869e-08		7.33019	7.26971	11.6746	11.8046
	Sum	69.2244	69.7153	68.1538	70.1964	90.3866	90.2052	90.9445	91.232		69.3225	90.6921		1.30826	1.0753e-08		70.7915	70.1746	90.3528	91.2921
Citrate_465
	m1	3.2145	4.42513	4.55017	5.80175	8.80559	6.57551	5.35195	2.9636		4.49789	5.92416		1.3171	0.324224		0.544789	4.71404	3.13403	4.80865
	m2	29.19	29.9191	35.1916	40.3749	32.8391	31.832	33.5842	33.819		33.6689	33.0186		0.980685	0.813828		33.3468	37.1135	36.7451	28.0667
	m3	12.6495	11.7666	12.5831	6.64011	16.6139	15.8842	10.8894	21.5173		10.9098	16.2262		1.4873	0.0875002		13.0026	12.1441	15.024	18.526
	m4	11.4222	12.1802	10.6608	5.82069	10.9271	12.1284	15.8804	7.29266		10.021	11.5571		1.1533	0.525221		11.2966	11.1368	6.58969	13.5222
	Sum Mn	145.232	148.284	155.326	129.755	168.034	166.406	168.71	164.324		144.649	166.868		1.15361	0.00671059		151.433	159.92	148.055	170.609
Citrate_273	Carbon 1-5
	m1	9.97855	12.7272	10.5964	10.1274	11.4758	10.7436	9.95197	9.66158		10.8574	10.4582		0.963236	0.616929		10.8431	12.0245	10.8097	9.52058
	m2	30.5026	29.1091	30.4472	31.4067	32.2679	32.5604	32.8632	32.3134		30.3664	32.5012		1.0703	0.00491035		29.4586	29.349	32.358	33.1615
	m3	11.5448	13.0446	11.2484	10.4845	14.1135	15.1718	12.988	13.2564		11.5806	13.8825		1.19877	0.0195427		12.1285	11.7867	13.0855	14.1754
	m4	6.07278	6.14391	7.15254	7.40186	9.0943	8.61173	9.65965	10.2026		6.69277	9.39206		1.40331	0.00142963		7.35519	7.07153	10.882	9.32989
	Sum Mn	129.909	134.655	133.846	134.002	154.729	155.827	153.281	154.868		133.103	154.676		1.16208	1.90484e-06		135.566	134.369	158.31	155.689
Glycerol_293
	m1	0.333321	-2.11393	-2.70686	0.564876	-0.475898	-0.837829	1.57206	2.77768		-0.980647	0.759005		-0.773984	0.196311		0.309573	-0.873085	-1.14741	-1.31813
	m2	5.44225	6.09233	7.94632	10.7614	10.27	13.795	13.8376	13.6674		7.56057	12.8925		1.70523	0.0112728		11.0459	11.2763	9.71811	8.09069
	m3	23.0383	31.5102	30.8943	35.6174	40.1395	30.7453	39.6246	32.2566		30.265	35.6915		1.1793	0.181017		29.2081	29.8084	42.6368	39.3211
	Sum Mn	80.3326	104.601	105.869	128.94	140.483	118.988	148.121	126.882		104.936	133.618		1.27334	0.0525532		110.026	111.105	146.199	132.826
Glutamate_348
	m1	6.06766	5.49662	5.35514	6.30398	5.0465	4.84235	4.55464	4.69106		5.80585	4.78363		0.823934	0.00641776		5.33902	5.52986	4.86112	4.77852
	m2	23.7592	23.8345	24.1072	24.8688	23.3275	24.115	22.7543	21.9936		24.1424	23.0476		0.954652	0.0777366		23.6039	23.5982	21.9059	21.748
	m3	8.1181	8.25388	7.79116	7.75664	8.5435	8.86948	8.44507	8.6225		7.97995	8.62014		1.08023	0.00566367		8.14149	8.19058	8.4873	8.80662
10	m4	6.66284	6.32952	6.92325	7.07182	7.99998	8.01554	8.01205	7.50372		6.74686	7.88282		1.16837	0.0014983		6.93481	6.36637	7.40515	7.67064
	Sum Mn	104.592	103.245	104.636	107.599	109.332	111.743	107.447	104.561		105.018	108.271		1.03097	0.116388		104.711	102.764	103.755	105.377
Malate_233
	M1	17.6886	19.8674	19.1358	17.1625	17.403	16.0426	16.528	15.6988		18.4008	16.4331		0.893061	0.0022821		17.8392	18.7114	16.1049	16.8209
	M2	19.0962	18.0803	19.0545	18.1519	20.6207	21.1586	20.1633	20.536		18.6246	20.5516		1.10346	4.64204e-05		18.0456	19.3193	20.6286	20.2024
	M3	8.33303	8.33672	8.09288	8.57538	12.6296	12.9883	13.2468	12.7991		8.42595	13.0068		1.54366	1.83736e-10		8.90013	8.31755	12.8292	13.5479
	Sum	80.8802	81.0382	81.5233	79.1925	96.5333	97.3249	96.5949	95.1679		80.9279	96.5567		1.19312	1.15141e-10		80.6307	82.3027	95.8498	97.8695
Total label		LC01	LC02	LC03	LC04	LT01	LT02	LT03	LT04								LC05	LC06	LT05	LT06
Glycerol_293	Glycerol	80.3326	104.601	105.869	128.94	140.483	118.988	148.121	126.882		104.936	133.618		1.27334	0.0525532	6	110.026	111.105	146.199	132.826
alph-Glycerol phosphate_445	alph-Glycerol phosphate	41.7089	43.2165	45.6441	44.4506	53.645	55.2453	53.7313	55.2998		43.755	54.4804		1.24512	3.05692e-05	6	46.3583	45.6318	54.9576	56.4528
G3P_357	3-Phosphoglyceric acid	27.5175	27.656	28.4857	28.7306	34.7532	34.7443	35.0358	35.5219		28.0974	35.0138		1.24616	1.11553e-06	3	29.4574	29.4521	35.0083	36.1343
Pyruvate_174	Pyruvate	149.415	166.046	177.784	93.1003	169.295	178.416	184.64	184.171		146.586	179.13		1.22201	0.139143	6	150.683	140.882	174.372	166.198
Lactate_219	Lactate	169.41	180.161	183.012	174.863	175.041	179.683	168.456	176.601		176.861	174.946		0.989169	0.63431	6	185.436	183.036	175.998	168.93
Citrate_273	Citrate	129.909	134.655	133.846	134.002	154.729	155.827	153.281	154.868		133.103	154.676		1.16208	1.90484e-06	10	135.566	134.369	158.31	155.689
Succinate_247	Succinate	37.944	64.9145	99.7509	43.6385	109.74	104.583	105.618	108.987		61.562	107.232		1.74185	0.0174375	10	95.7851	83.5906	108.659	98.3568
Fumarate_245	Fumarate	96.0652	98.2785	97.4148	94.9185	119.671	117.254	117.888	120.122		96.6692	118.734		1.22825	6.0721e-07	10	97.3624	96.687	118.833	121.898
Malate_233	Malate	80.8802	81.0382	81.5233	79.1925	96.5333	97.3249	96.5949	95.1679		80.6586	96.4053		1.19523	4.18488e-07	6	80.6307	82.3027	95.8498	97.8695
Aspartic acid_232	Aspartic acid	69.2244	69.7153	68.1538	70.1964	90.3866	90.2052	90.9445	91.232		69.3225	90.6921		1.30826	1.0753e-08	6	70.7915	70.1746	90.3528	91.2921
Glutamate_348	Glutamate	104.592	103.245	104.636	107.599	109.332	111.743	107.447	104.561		105.018	108.271		1.03097	0.116388	10	104.711	102.764	103.755	105.377
	Glycerol	13.3888	17.4335	17.6448	21.49	23.4138	19.8313	24.6868	21.147		17.4893	22.2697		1.27334	0.0525532
	alph-Glycerol phosphate	6.95148	7.20275	7.60735	7.40843	8.94083	9.20755	8.95522	9.21664		7.2925	9.08006		1.24512	3.05692e-05
	3-Phosphoglyceric acid	9.17251	9.21867	9.49522	9.57687	11.5844	11.5814	11.6786	11.8406		9.36582	11.6713		1.24616	1.11553e-06
	Pyruvate	24.9025	27.6744	29.6306	15.5167	28.2158	29.736	30.7733	30.6951		24.4311	29.8551		1.22201	0.139143
	Lactate	28.2349	30.0268	30.5019	29.1438	29.1735	29.9472	28.0761	29.4336		29.4769	29.1576		0.989169	0.63431
	Citrate	12.9909	13.4655	13.3846	13.4002	15.4729	15.5827	15.3281	15.4868		13.3103	15.4676		1.16208	1.90484e-06
	Succinate	3.7944	6.49145	9.97509	4.36385	10.974	10.4583	10.5618	10.8987		6.1562	10.7232		1.74185	0.0174375
	Fumarate	9.60652	9.82785	9.74148	9.49185	11.9671	11.7254	11.7888	12.0122		9.66692	11.8734		1.22825	6.0721e-07
	Malate	13.48	13.5064	13.5872	13.1988	16.0889	16.2208	16.0992	15.8613		13.4431	16.0675		1.19523	4.18488e-07
	Aspartic acid	11.5374	11.6192	11.359	11.6994	15.0644	15.0342	15.1574	15.2053		11.5537	15.1153		1.30826	1.0753e-08
	Glutamate	10.4592	10.3245	10.4636	10.7599	10.9332	11.1743	10.7447	10.4561		10.5018	10.8271		1.03097	0.116388

## Sheet: Sheet1
	Acetyl-Carnitine						Acetyl-CoA									SuccCOA	SuccCOA_M1	SuccCOA_M2	SuccCOA_M3	SuccCOA_M4
Average	0.095892	0.00745811	0.0174849				0.13086	0.0179718	0.1352
	0.267115	0.0184518	0.0186724				0.201707	0.0254912	0.153024
	0.0934029	0.00729441	0.0176516		C001		0.148269	0.0193286	0.142475					C005		0.0474727	0.00858654	0.00420148	0.000436456	0.000243802
	0.0973766	0.00735077	0.0173582		C002		0.127486	0.0202031	0.131914					C006		0.0785276	0.0115782	0.00489421	0.000567134	0.000791142
	0.104797	0.00719286	0.0171277		C003		0.132579	0.0188171	0.13499					T005		0.10537	0.0205235	0.00773936	0.00131076	0.000365167
	0.0976537	0.00736705	0.0170289		C004		0.0863035	0.0100312	0.0890048					T006		0.142037	0.0234565	0.00987554	0.000583938	0.00034155
	0.0810296	0.00707815	0.0179399		C005		0.134001	0.0171743	0.171517					LC01		0.0153327	0.00632275	0.00772324	0.00525484	0.00111815
	0.101092	0.0084654	0.017803		C006		0.156523	0.0222766	0.141301					LC02		0.0192842	0.00531486	0.0106069	0.00437158	0.00278022
	0.29884	0.0210118	0.0185505		T001		0.247067	0.0313241	0.183149					LC03		0.0352001	0.0171051	0.0206758	0.0113777	0.00744356
	0.244065	0.0165656	0.0180503		T002		0.178567	0.0230376	0.163725					LC04		0.0335132	0.0142298	0.0192168	0.00854341	0.00667263
	0.266137	0.017519	0.0194409		T003		0.169334	0.0189606	0.133527					LC05		0.0334085	0.012403	0.0188581	0.00877123	0.00531561
	0.305695	0.0215001	0.0185208		T004		0.232667	0.031099	0.140061					LC06		0.0471169	0.0207159	0.0300272	0.0172619	0.00775986
	0.251601	0.0181508	0.0192169		T005		0.212251	0.0263244	0.166134					LT01		0.0279004	0.00984327	0.0212186	0.00861803	0.00892721
	0.236353	0.0159636	0.0182547		T006		0.170359	0.0222013	0.131548					LT02		0.0328669	0.0112887	0.0209046	0.00846313	0.00884984
	0.103304	0.00922393	0.0712235		LC01		0.0948937	0.0132446	0.213962					LT03		0.0511021	0.0214106	0.0359359	0.0194625	0.0164538
	0.102432	0.00865814	0.0728129		LC02		0.0994908	0.0144098	0.229148					LT04		0.0376976	0.0140924	0.0234485	0.0111117	0.0105054
	0.115256	0.011785	0.0788974		LC03		0.10906	0.0060354	0.275191					LT05		0.0551344	0.0183666	0.0371275	0.0154551	0.0166246
	0.0993334	0.0102134	0.0721028		LC04		0.108444	0.0160784	0.247136					LT06		0.0430698	0.0184423	0.0341232	0.0147627	0.0133002
	0.102964	0.00924247	0.0742393		LC05		0.116419	0.0152213	0.242132
	0.104783	0.009391	0.0721047		LC06		0.107329	0.0137782	0.212543								m1	m2	m3	m4		M0	M1	M2	M3
	0.218175	0.018169	0.162862		LT01		0.0513745	0.0086428	0.195772					C005			0	1.82708e-15	1.14192e-16	5.70961e-17		100	0	1.82708e-15	1.14192e-16
	0.198715	0.0181403	0.145513		LT02		0.101985	0.0139125	0.147393					C006			-3.49251	-2.10304	0.483504	0.646744		105.145	-3.51525	-2.11673	0.486652
	0.21573	0.0182197	0.158211		LT03		0.0608641	0.00984153	0.228208					T005			1.38966	-1.75624	0.519133	-0.11819		99.8476	1.38802	-1.75417	0.51852
	0.216984	0.0186393	0.157193		LT04		0.107752	0.016129	0.282575					T006			-1.62774	-1.66919	-0.0799948	-0.105445		103.373	-1.62603	-1.66743	-0.0799105
	0.182552	0.0159879	0.134079		LT05		0.0754841	0.010715	0.1804					LC01			12.5912	20.3059	13.3535	-0.641069		54.044	12.511	20.1765	13.2685
	0.184489	0.0158027	0.143047		LT06		0.0909207	0.013721	0.137049					LC02			5.43381	25.4898	7.38414	4.33343		59.957	5.67995	26.6444	7.71862
Average														LC03			14.6497	21.307	9.92998	6.09172		51.1366	15.6001	22.6892	10.5741
C	0.095892	0.00745811	0.0174849				0.13086	0.0179718	0.1352					LC04			12.4633	22.5419	7.38551	6.47334		54.6752	13.326	24.1021	7.89669
T	0.267115	0.0184518	0.0186724				0.201707	0.0254912	0.153024					LC05			10.1625	23.5689	8.36143	4.52737		55.9111	10.6444	24.6865	8.75793
LC	0.104679	0.00975232	0.0735634				0.105939	0.0131279	0.236685					LC06			12.4844	24.2155	11.7451	3.3148		49.8941	12.9125	25.0457	12.1477
LT	0.202774	0.0174932	0.150151				0.0813968	0.0121603	0.195233					LT01			7.78854	29.0343	7.63565	10.24		50.4696	8.67707	32.3466	8.50675
														LT02			8.0798	25.7476	6.96691	9.51225		54.9174	8.92916	28.4542	7.69928
FC T/C	2.78558	2.47406	1.06791				1.54139	1.4184	1.13183					LT03			10.4601	25.1131	10.8594	9.63634		48.6158	11.5756	27.7911	12.0174
FC LT/LC	1.93711	1.79374	2.04111				0.768333	0.926291	0.824863					LT04			9.34283	24.1429	8.63348	9.46067		53.4796	10.3191	26.6657	9.53561
														LT05			7.30657	26.748	7.52666	10.4282		53.5778	8.15723	29.8621	8.40294
FC LT/LC	7.25775e-08	4.67113e-07	0.00131212				0.00192161	0.018598	0.227211					LT06			10.72	28.5658	8.34286	9.0267
p	7.79975e-08	5.08574e-07	1.38705e-08				0.0306855	0.618815	0.115834
		M1	M2								M1	M2			Average	LC	11.2975	22.9048	9.69327	4.0166		54.2697	11.779	23.8908	10.0606
		1.43207	37.5298		LC01						0.330493	16.7344				LT	8.94966	26.5586	8.32749	9.71737		52.212	9.53163	29.0239	9.2324
		1.12967	38.457		LC02						2.46112	20.8593
		2.2135	37.0153		LC03						1.22169	20.2316				FC	0.79218	1.15952	0.8591	2.4193		0.962085	0.809208	1.21486	0.91768
		2.19228	38.5441		LC04						-0.802774	21.6759				p	0.132713	0.00818427	0.261831	0.00033077		0.312995	0.200851	0.00399869	0.523348
		1.43307	38.6987		LC05						0.117421	34.2179
		1.4534	37.4711		LC06						1.37687	12.2698
		1.03272	39.7862		LT01						0.0414196	-1.77006
		1.51282	39.0696		LT02						0.227212	13.6063
		1.11037	39.2853		LT03						-1.41604	3.11771
		1.20199	38.9232		LT04						0.857487	-18.5458
		1.2935	39.2444		LT05						-0.23012	2.38526
		1.15234	40.7368		LT06						0.387788	1.28222
											0.526228	59.5956
Average	LC	1.64233	37.9527								0.720837	60.2271
	LT	1.21729	39.5076								-2.62846	65.627
											0.861909	59.7588
	FC	0.741197	1.04097								0.187901	56.8013
	p	0.055814	0.00280913								0.0897919	54.9338
											1.02369	74.5181
											0.592156	40.4234
											0.878235	74.2566
											0.808192	64.5199
											0.588825	61.6021
											1.38603	42.1211
